# Supplementary material for: Enhancement of intercellular interaction between iPSC-derived neural progenitor cells and activated endothelial cells using cell surface modification with functional oligopeptides
Source: Royal Society of Chemistry journal article supplement (doi:10.1039/d1bm01503f), 2021-12-28
Supplement: d1bm01503f1.pdf [file d1bm01503f1.pdf]

## Supporting Information

### **Enhancement of intercellular interaction between iPSC-derived neural progenitor cells and activated endothelial cells using cell surface modification with functional oligopeptides**

Isha Goel<sup>1</sup>, Makoto Noiri<sup>1</sup>, Yuka Yamauchi<sup>2,3</sup>, Koichi Kato<sup>2</sup>, Ung-il Chung<sup>1</sup>, Yuji Teramura<sup>4,5</sup>

<sup>1</sup>Department of Bioengineering, School of Engineering, The University of Tokyo, 7-3-1 Hongo, Bunkyo-ku, Tokyo, 113-8656, Japan

<sup>2</sup>Department of Biomaterials, Graduate School of Biomedical and Health Sciences, Hiroshima University, 1-2-3 Kasumi, Minami-ku, Hiroshima, 734-8553 Japan

<sup>3</sup>Department of Orthodontics, Division of Oral Health and Development, Hiroshima University Hospital, 1-2-3 Kasumi, Minami-ku, Hiroshima, 734-8551, Japan

<sup>4</sup>Cellular and Molecular Biotechnology Research Institute (CMB), National Institute of Advanced Industrial Science and Technology (AIST), Tsukuba Central fifth, 1-1-1 Higashi, Tsukuba, Ibaraki 305-8565, Japan

<sup>5</sup>Department of Immunology, Genetics and Pathology (IGP), Uppsala University, Dag Hammarskjölds väg 20, SE-751 85, Uppsala, Sweden

#### **\*Corresponding Author**

Yuji TERAMURA

Tel: +81(0)29-861-6582, E-mail: [y.teramura@aist.go.jp](mailto:y.teramura@aist.go.jp)

**Table S1.** Calculated values of number of Esbp-PEG(5k and 40k)-lipids per cell with mean and standard deviations.

(1) Esbp-PEG(5k)-lipids

| Concentrations $\mu\text{M}$ | Number per cell         |                         |                         | Mean number             | Std Dev             |
|------------------------------|-------------------------|-------------------------|-------------------------|-------------------------|---------------------|
| 0                            | 0                       | 0                       | 0                       | 0                       | 0                   |
| 2.439                        | $1.512 \times 10^9$     | $1.248 \times 10^9$     | $1.149 \times 10^9$     | $1.303 \times 10^9$     | $1.877 \times 10^8$ |
| 12.1951                      | $3.999 \times 10^9$     | $3.942 \times 10^9$     | $4.021 \times 10^9$     | $3.987 \times 10^9$     | $4.052 \times 10^7$ |
| 24.3902                      | $1.1027 \times 10^{10}$ | $1.0029 \times 10^{10}$ | $1.01 \times 10^{10}$   | $1.0385 \times 10^{10}$ | $5.566 \times 10^8$ |
| 121.9512                     | $1.8274 \times 10^{10}$ | $1.8574 \times 10^{10}$ | $1.9436 \times 10^{10}$ | $1.8761 \times 10^{10}$ | $6.031 \times 10^8$ |
| 243.9024                     | $1.6514 \times 10^{10}$ | $1.6657 \times 10^{10}$ | $1.655 \times 10^{10}$  | $1.6573 \times 10^{10}$ | $7.417 \times 10^7$ |

(1) Esbp-PEG(40k)-lipids

| Concentrations $\mu\text{M}$ | Number per cell     |                     |                     | Mean number            | Std Dev             |
|------------------------------|---------------------|---------------------|---------------------|------------------------|---------------------|
| 0                            | 0                   | 0                   | 0                   | 0                      | 0                   |
| 2.439                        | $2.774 \times 10^5$ | $2.032 \times 10^5$ | $4.487 \times 10^5$ | $3.098 \times 10^5$    | $1.258 \times 10^5$ |
| 12.1951                      | $3.359 \times 10^7$ | $3.270 \times 10^7$ | $3.607 \times 10^7$ | $3.412 \times 10^{10}$ | $1.748 \times 10^6$ |
| 24.3902                      | $3.991 \times 10^7$ | $3.780 \times 10^7$ | $3.670 \times 10^7$ | $3.814 \times 10^7$    | $1.630 \times 10^6$ |
| 121.9512                     | $2.067 \times 10^8$ | $1.948 \times 10^8$ | $1.912 \times 10^8$ | $1.976 \times 10^8$    | $8.097 \times 10^6$ |
| 243.9024                     | $2.323 \times 10^8$ | $2.323 \times 10^8$ | $2.323 \times 10^8$ | $2.323 \times 10^8$    | 0                   |

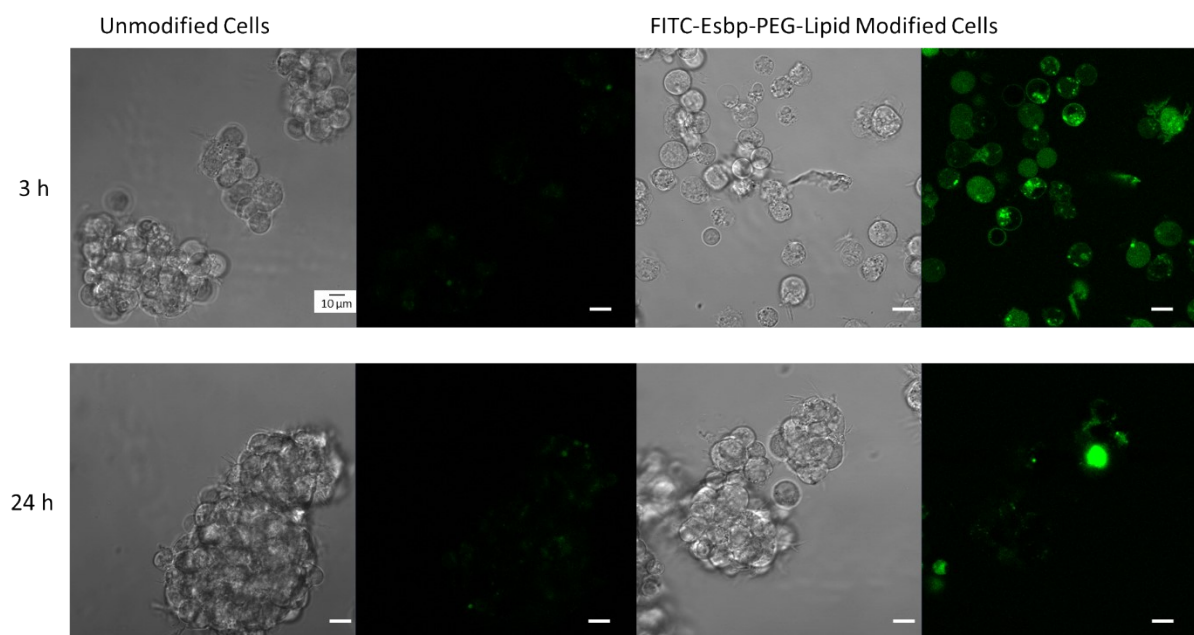

**Figure S1.** Confocal microscopy images of single NPCs treated with FITC-Esbp-PEG-lipid for 3 and 24 h and non-modified NPCs. No fluorescence could be observed in non-modified cells. In modified cells, a reduced fluorescence could be observed compared to control cells (treated for 0 h), which almost disappeared at 24 h, indicating that the cell surface is no longer modified.

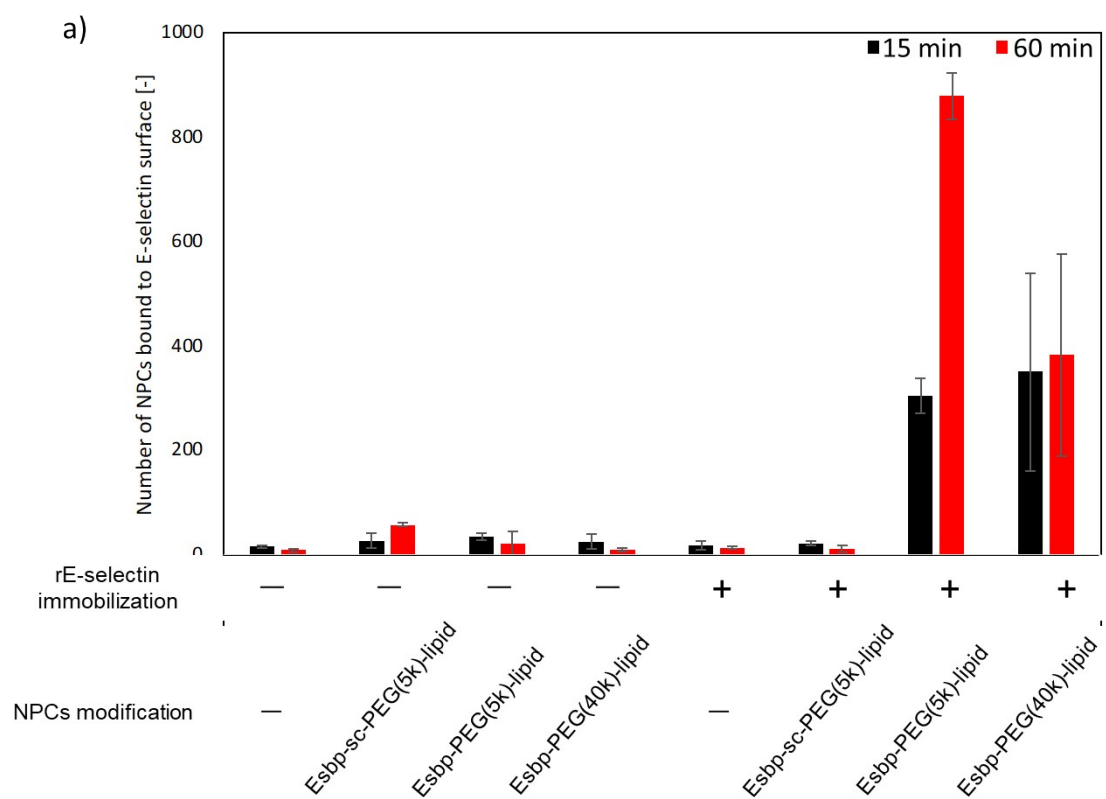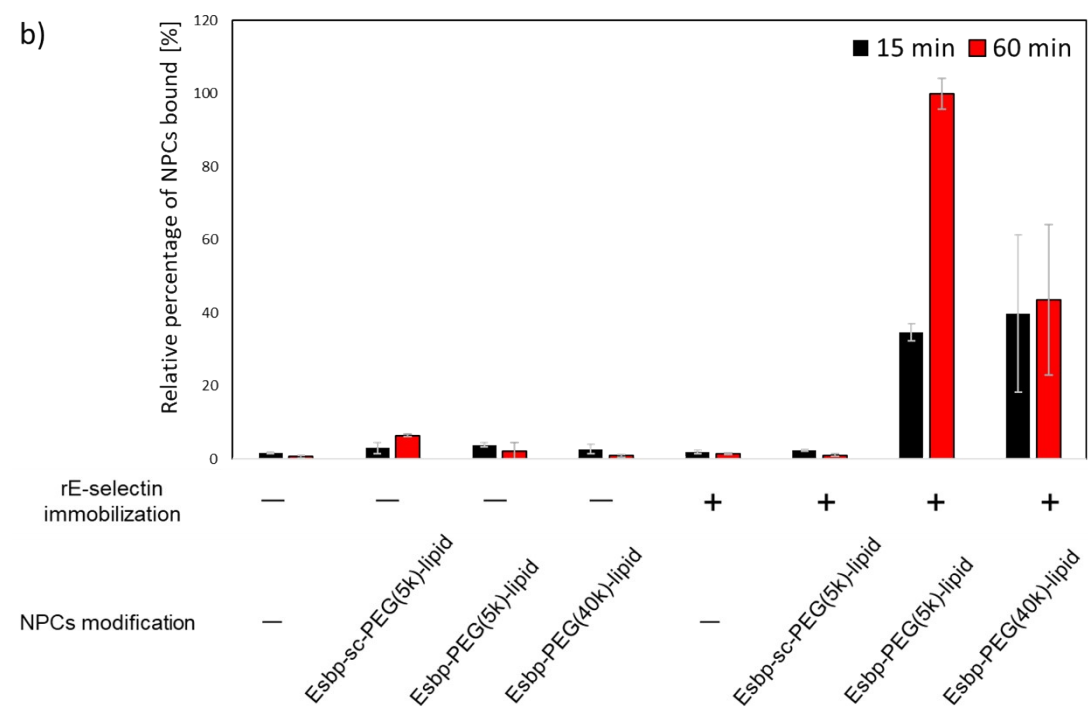

**Figure S2.** Graph representing (a) number of Esbp-PEG(5k and 40k)-lipid modified neural progenitor cells adhered to recombinant E-selectin surface at 15 and 60 min and (b) the relative number shown in Fig 5(b) without statistical bars. Experimental conditions included, i) non-modified TCPS surface and cells with no surface modification, Esbp-sc-PEG(5k)-lipid, Esbp-PEG(5k and 40k)-lipid modification and ii) rE-selectin surface with no cell modification, Esbp-sc-PEG(5k)-lipid, Esbp-PEG(5k and 40k)-lipid modification.

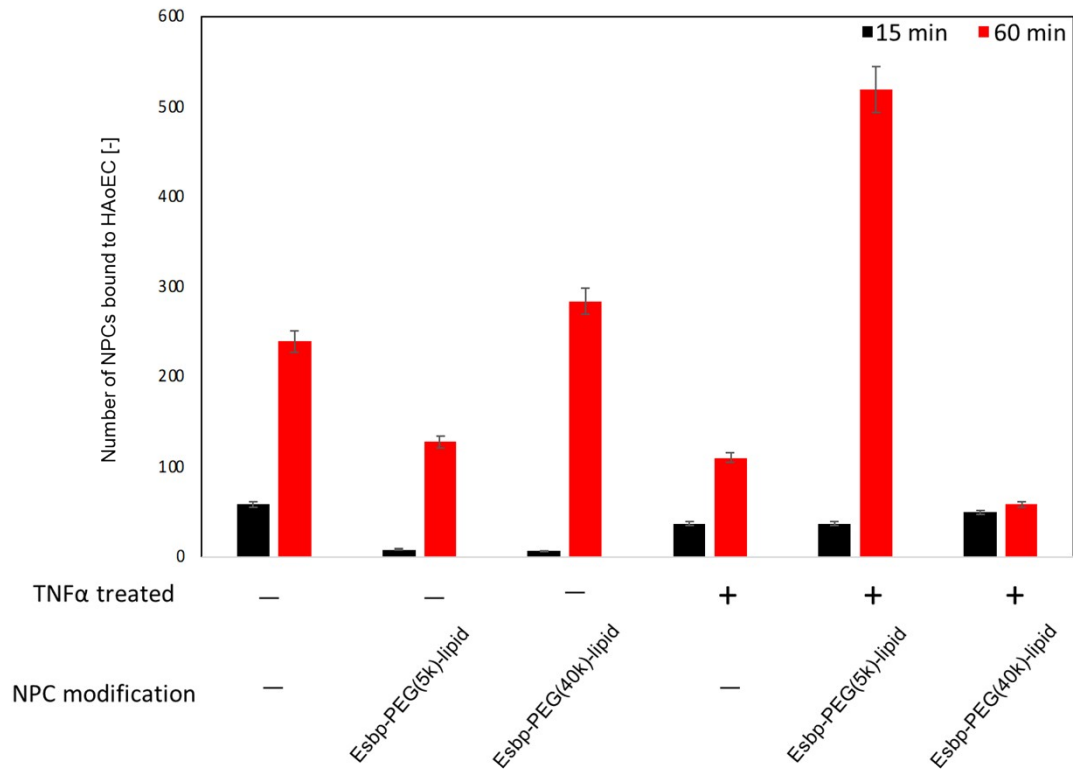

**Figure S3.** Graph representing number of Esbp-PEG(5k and 40k)-lipid modified neural progenitor cells adhered to activated endothelial cells at 15 and 60 min. Experimental conditions included, i) non-activated endothelial cells and neural progenitor cells with no surface modification or Esbp-PEG(5k and 40k)-lipid modification, and ii) activated endothelial cells with no NPC surface modification or Esbp-PEG(5k and 40k)-lipid modification.
